# Supplementary material
Source: publisher site journal article supplement (https://www.dovepress.com/article/499846)
Supplement: Supplementary file 1 [file get_supplementary_file.php]

**Supplementary Table 1.** STROBE reporting checklist.

|  | **Item No** | **Recommendation** | **Page No** |
| --- | --- | --- | --- |
| **Title and abstract** | 1 | (*a*) Indicate the study’s design with a commonly used term in the title or the abstract | Page 2 |
| (*b*) Provide in the abstract an informative and balanced summary of what was done and what was found | Pages 1-2 |
| **Introduction** | | | |
| Background/rationale | 2 | Explain the scientific background and rationale for the investigation being reported | Pages 4-6 |
| Objectives | 3 | State specific objectives, including any prespecified hypotheses | Page 6 |
| **Methods** | | | |
| Study design | 4 | Present key elements of study design early in the paper | Pages 6 |
| Setting | 5 | Describe the setting, locations, and relevant dates, including periods of recruitment, exposure, follow-up, and data collection | Pages 6 |
| Participants | 6 | (*a*) Give the eligibility criteria, and the sources and methods of selection of participants. Describe methods of follow-up | Page 6-7 |
| (*b*)For matched studies, give matching criteria and number of exposed and unexposed | - |
| Variables | 7 | Clearly define all outcomes, exposures, predictors, potential confounders, and effect modifiers. Give diagnostic criteria, if applicable | Page 8-11 |
| Data sources/ measurement | 8* | For each variable of interest, give sources of data and details of methods of assessment (measurement). Describe comparability of assessment methods if there is more than one group | Page 8-10 |
| Bias | 9 | Describe any efforts to address potential sources of bias | Pages 10-12 |
| Study size | 10 | Explain how the study size was arrived at | - |
| Quantitative variables | 11 | Explain how quantitative variables were handled in the analyses. If applicable, describe which groupings were chosen and why | Pages 10-12 |
| Statistical methods | 12 | (*a*) Describe all statistical methods, including those used to control for confounding | Pages 10-12 |
| (*b*) Describe any methods used to examine subgroups and interactions | Pages 10-12 |
| (*c*) Explain how missing data were addressed | Pages 10-12 |
| (*d*) If applicable, explain how loss to follow-up was addressed | Pages 10-12 |
| (*e*) Describe any sensitivity analyses | - |
| **Results** | | |  |
| Participants | 13* | (a) Report numbers of individuals at each stage of study—eg numbers potentially eligible, examined for eligibility, confirmed eligible, included in the study, completing follow-up, and analysed | Figure 1  &  Page 12 |
| (b) Give reasons for non-participation at each stage |
| (c) Consider use of a flow diagram |
| Descriptive data | 14* | (a) Give characteristics of study participants (eg demographic, clinical, social) and information on exposures and potential confounders | Table 1  &  Pages 12-13 |
| (b) Indicate number of participants with missing data for each variable of interest |
| (c) Summarise follow-up time (eg, average and total amount) |
| Outcome data | 15* | Report numbers of outcome events or summary measures over time | Table 2 & Table 3 & Table 4 & Supplementary Table 3 & Pages 13-16 |
| Main results | 16 | (*a*) Give unadjusted estimates and, if applicable, confounder-adjusted estimates and their precision (eg, 95% confidence interval). Make clear which confounders were adjusted for and why they were included | Table 2 & Table 3 & Table 4 & Supplementary Table 3 & Pages 13-16 |
| (*b*) Report category boundaries when continuous variables were categorized |  |
| (*c*) If relevant, consider translating estimates of relative risk into absolute risk for a meaningful time period |  |
| Other analyses | 17 | Report other analyses done—eg analyses of subgroups and interactions, and sensitivity analyses | Table 2 & Table 3 & Table 4 & Supplementary Table 3 & Pages 13-16 |
| **Discussion** | | | |
| Key results | 18 | Summarise key results with reference to study objectives | Page 17 |
| Limitations | 19 | Discuss limitations of the study, taking into account sources of potential bias or imprecision. Discuss both direction and magnitude of any potential bias | Pages 20-21 |
| Interpretation | 20 | Give a cautious overall interpretation of results considering objectives, limitations, multiplicity of analyses, results from similar studies, and other relevant evidence | Pages 17-21 |
| Generalisability | 21 | Discuss the generalisability (external validity) of the study results | Pages 17-21 |
| **Other information** | | | |
| Funding | 22 | Give the source of funding and the role of the funders for the present study and, if applicable, for the original study on which the present article is based | Page 24 |

*Give information separately for exposed and unexposed groups.

**Note:** An Explanation and Elaboration article discusses each checklist item and gives methodological background and published examples of transparent reporting. The STROBE checklist is best used in conjunction with this article (freely available on the Web sites of PLoS Medicine at http://www.plosmedicine.org/, Annals of Internal Medicine at http://www.annals.org/, and Epidemiology at http://www.epidem.com/). Information on the STROBE Initiative is available at http://www.strobe-statement.org.

**Supplementary Table 2.** Model fit for both unfiltered and filtered models: intention-to-treat.

| **Model** | **Outcome** | **Model fit** | | | | |
| --- | --- | --- | --- | --- | --- | --- |
| **Chi-sq (df)** | ***P-value*** | **RMSEA** | **CFI** | **SRMR** |
| General | Pain intensity | 12 | <.001 | **0.052** | **0.96** | **0.068** |
| WPAI Activity >0 | 12 | <.001 | **0.057** | **0.94** | **0.099** |
| Multigroup | Pain intensity | 36 | <.001 | **0.066** | **0.97** | **0.069** |
| WPAI Activity >0 | 36 | <.001 | **0.079** | **0.95** | **0.097** |

**Abbreviations:** WPAI, Work Productivity and Activity Impairment Questionnaire.

**Note:** If a significant chi-square is found for a model, then comparative fit index values (CFI) > .9, or root mean square error of approximation values (RMSEA) < .08, or standardized root mean squared residual values (SRMR) <.05 signify models with acceptable fit [1,2]. Parameters denoting acceptable fit are presented in bold.

**Supplementary Table 3.** Impact of covariates on mean change for the entire cohort and stratified by BMI level: intent-to-treat analysis.

| **Outcome,**  **Mean (95% CI)** | **Covariate** | **Intercept** | | | | | | | | **Slope** | | | | | | | |
| --- | --- | --- | --- | --- | --- | --- | --- | --- | --- | --- | --- | --- | --- | --- | --- | --- | --- |
| **Total Cohort** | **P** | **Non**  **Obesity** | **P** | **Obesity** | **P** | **Severe obesity** | **P** | **Total Cohort** | **P** | **Non-**  **Obesity** | **P** | **Obesity** | **P** | **Severe obesity** | **P** |
| **Pain intensity** | **Gender**  **=women** | 0.51  (0.46;0.56) | *<.001* | 0.48 (0.41;0.54) | *<.001* | 0.54  (0.45;0.62) | *<.001* | 0.53  (0.35;0.71) | *<.001* | -0.13  (-0.20;-0.06) | *<.001* | -0.15  (-0.24;-0.07) | *0.001* | -0.10  (-0.22;0.02) | 0.115 | -0.17  (-0.45;0.10) | 0.220 |
| **Age** | 0.11  (0.08;0.13) | *<.001* | 0.11 (0.08;0.14) | *<.001* | 0.08  (0.03;0.13) | *0.001* | 0.22  (0.13;0.31) | *<.001* | -0.05  (-0.09;-0.02) | *0.002* | -0.07  (-0.11;-0.03) | *0.001* | -0.02  (-0.09;0.04) | 0.509 | 0.04  (-0.10;0.18) | 0.587 |
| **BMI** | 0.23  (0.21;0.25) | *<.001* | - | - | - | - | - | - | -0.04  (-0.08;-0.01) | *0.021* | - | - | - | - | - | - |
| **Time length** | -0.01  (-0.03;0.02) |  | -0.02  (-0.06;0.01) | 0.217 | 0.01  (-0.03;0.05) | 0.583 | 0.00  (-0.05;0.06) | 0.895 | 0.01  (-0.02;0.04) | 0.712 | 0.02  (-0.02;0.05) | 0.427 | -0.01  (-0.05;0.04) | 0.767 | -0.00  (-0.07;0.07) | 0.954 |
| **Presence of comorbidities** | 0.16 (0.08;0.24) | *<.001* | 0.24 (0.11;0.37) | *<.001* | 0.13  (0.00;0.25) | *0.043* | 0.10  (-0.10;0.30) | 0.337 | -0.08  (-0.19;0.03) | 0.157 | -0.14  (-0.31;0.03) | 0.101 | -0.03  (-0.20;0.14) | 0.732 | -0.07  (-0.38;0.24) | 0.648 |
| **WPAI Activities** | **Gender**  **=women** | 0.43 (0.36;0.49) | *<.001* | 0.38  (0.30;0.47) | *<.001* | 0.46  (0.35;0.58) | *<.001* | 0.39  (0.14;0.64) | *0.002* | -0.08  (-0.17;0.01) | 0.066 | -0.14  (-0.26;-0.03) | *0.012* | -0.01  (-0.17;0.15) | 0.924 | 0.15  (-0.25;0.55) | 0.464 |
| **Age** | -0.01  (-0.05;0.02) | 0.384 | -0.04  (-0.08;0.01) | 0.081 | -0.00  (-0.06;0.06) | 0.930 | 0.16  (0.04;0.28) | *0.009* | 0.07  (0.03;0.12) | *0.001* | 0.05  (-0.00;0.11) | 0.062 | 0.10  (0.01;0.19) | *0.025* | 0.19  (-0.01;0.39) | 0.057 |
| **BMI** | 0.31  (0.28;0.35) | *<.001* | - | - | – | - | - | - | -0.05  (-0.10;-0.00) | 0.050 | - | - | - | - | - | - |
| **Time length** | -0.03  (-0.04;-0.02) | *<.001* | -0.04  (-0.08;0.00) | 0.057 | -0.03  (-0.08;0.02) | 0.273 | -0.02  (-0.09;0.06) | 0.649 | 0.03 (0.01;0.05) | *<.001* | 0.04  (0.00;0.08) | *0.041* | 0.02  (-0.03;0.07) | 0.414 | -0.00  (-0.09;0.09) | 0.994 |
| **Presence of comorbidities** | 0.09 (-0.02;0.20) | 0.092 | 0.15  (-0.02;0.32) | 0.081 | 0.11  (-0.05;0.27) | 0.180 | -0.02  (-0.30;0.25) | 0.861 | -0.09  (-0.24;0.06) | 0.253 | -0.09  (-0.30;0.13) | 0.447 | -0.16  (-0.37;0.07) | 0.167 | 0.14  (-0.30;0.59) | 0.521 |

**Abbreviations:** BMI, Body mass index; CI, confidence intervals; P, P-values; WPAI, Work Productivity and Activity Impairment questionnaire.

**Note:** significant P-values are italicized
